# Supplementary material for: Rapid continuous aqueous production of copper indium sulfide quantum dots via a microwave-assisted microfluidic technique
Source: Royal Society of Chemistry journal article supplement (doi:10.1039/d4nr02202e), 2024-01-01
Supplement: d4nr02202e1.pdf [file d4nr02202e1.pdf]

## Supplementary Information

### **Rapid continuous aqueous production of copper indium sulfide quantum dots via microwave-assisted microfluidic technique**

*Lintao Chen,<sup>‡</sup> Zongkun Ding,<sup>‡</sup> Hong-Gang Ye, Cai-Feng Wang\*, and Su Chen\**

State Key Laboratory of Materials-Oriented Chemical Engineering, College of Chemical Engineering, Nanjing Tech University, No. 5 Xin Mofan Road, Nanjing 210009, P. R. China.

#### **Corresponding Authors**

\*C. -F. Wang. E-mail: caifengwang@njtech.edu.cn.

\*S. Chen. E-mail: chensu@njtech.edu.cn.

**KEYWORDS:** Quantum dots, copper indium sulfide, continuous production, microwave-assisted microfluidic technique, aqueous synthesis, tunable emission

**Table S1.** PL emission wavelengths of CIS QDs prepared with different ligands.

| No. | Flow rate (mL h <sup>-1</sup> ) | Temperature (°C) | [Cu]/[In]<br>molar ratio | Ligand | Emission<br>wavelength (nm) |
|-----|---------------------------------|------------------|--------------------------|--------|-----------------------------|
| 1   | 30                              | 95               | 1:16                     | GSH    | 720                         |
| 2   | 30                              | 95               | 1:16                     | LCy    | Non-fluorescent             |
| 3   | 30                              | 95               | 1:16                     | NAC    | 670                         |

**Table S2.** PL emission wavelengths of CIS-NAC QDs prepared at different flow rates.

| No. | Flow rate (mL h <sup>-1</sup> ) | Temperature (°C) | [Cu]/[In]<br>molar ratio | Ligand | Emission<br>wavelength (nm) |
|-----|---------------------------------|------------------|--------------------------|--------|-----------------------------|
| 1   | 20                              | 95               | 1:16                     | NAC    | 662                         |
| 2   | 25                              | 95               | 1:16                     | NAC    | 663                         |
| 3   | 30                              | 95               | 1:16                     | NAC    | 670                         |
| 4   | 35                              | 95               | 1:16                     | NAC    | 650                         |
| 5   | 40                              | 95               | 1:16                     | NAC    | 655                         |

**Table S3.** Experimental parameters and fluorescence performance of CIS QDs and CIS@ZnS QDs synthesized with different Cu/In ratios at 30 mL h<sup>-1</sup>.

| NO. | [Cu]/[In]<br>ratio | CIS                              |                            |          | CIS@ZnS                          |                            |          |
|-----|--------------------|----------------------------------|----------------------------|----------|----------------------------------|----------------------------|----------|
|     |                    | Peak emission<br>wavelength (nm) | Fluorescence<br>decay (ns) | PL QY(%) | Peak emission<br>wavelength (nm) | Fluorescence<br>decay (ns) | PL QY(%) |
| 1   | 1:8                | 684                              | 84.51                      | 4.6      | 640                              | 214.93                     | 24.4     |
| 2   | 1:12               | 674                              | 88.41                      | 6.7      | 627                              | 272.51                     | 27.7     |
| 3   | 1:16               | 670                              | 121.01                     | 7.0      | 619                              | 265.67                     | 26.2     |
| 4   | 1:24               | 651                              | 114.75                     | 5.6      | 616                              | 271.86                     | 28.6     |
| 5   | 1:32               | 638                              | 95.01                      | 5.9      | 604                              | 287.22                     | 44.0     |
| 6   | 1:64               | 617                              | 89.06                      | 3.0      | 601                              | 299.80                     | 12.0     |

**Table S4.** Time-resolved decay lifetimes of CIS QDs and CIS@ZnS QDs prepared with a Cu/In ratio of 1:32.

| Samples     | B <sub>1</sub> (%) | τ <sub>1</sub> (ns) | B <sub>2</sub> (%) | τ <sub>2</sub> (ns) | τ̄ (ns) |
|-------------|--------------------|---------------------|--------------------|---------------------|---------|
| CIS QDs     | 28.49              | 12.66               | 71.51              | 127.82              | 95.01   |
| CIS@ZnS QDs | 20.35              | 63.70               | 79.65              | 344.33              | 287.22  |

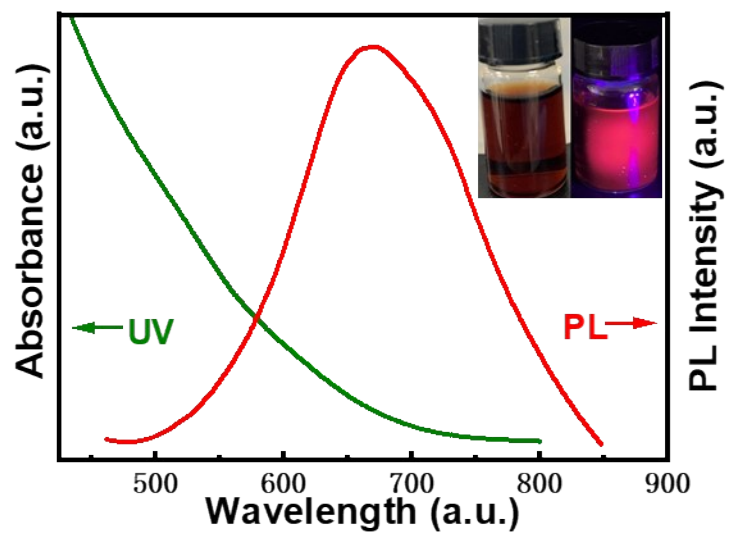

**Fig. S1** Absorption and emission spectra of CIS QDs produced with a Cu/In ratio of 1:16 and a flow rate of 30 mL h<sup>-1</sup>.
